# Supplementary material for: RETRACTED: An Innovative Tool for Evidence-Based, Personalized Treatment Trials in Mucopolysaccharidosis
Source: MDPI journal article supplement (doi:10.3390/pharmaceutics15051565), 2023-05-22
Supplement: s1 [file s1]

## Data and Drug Selection:

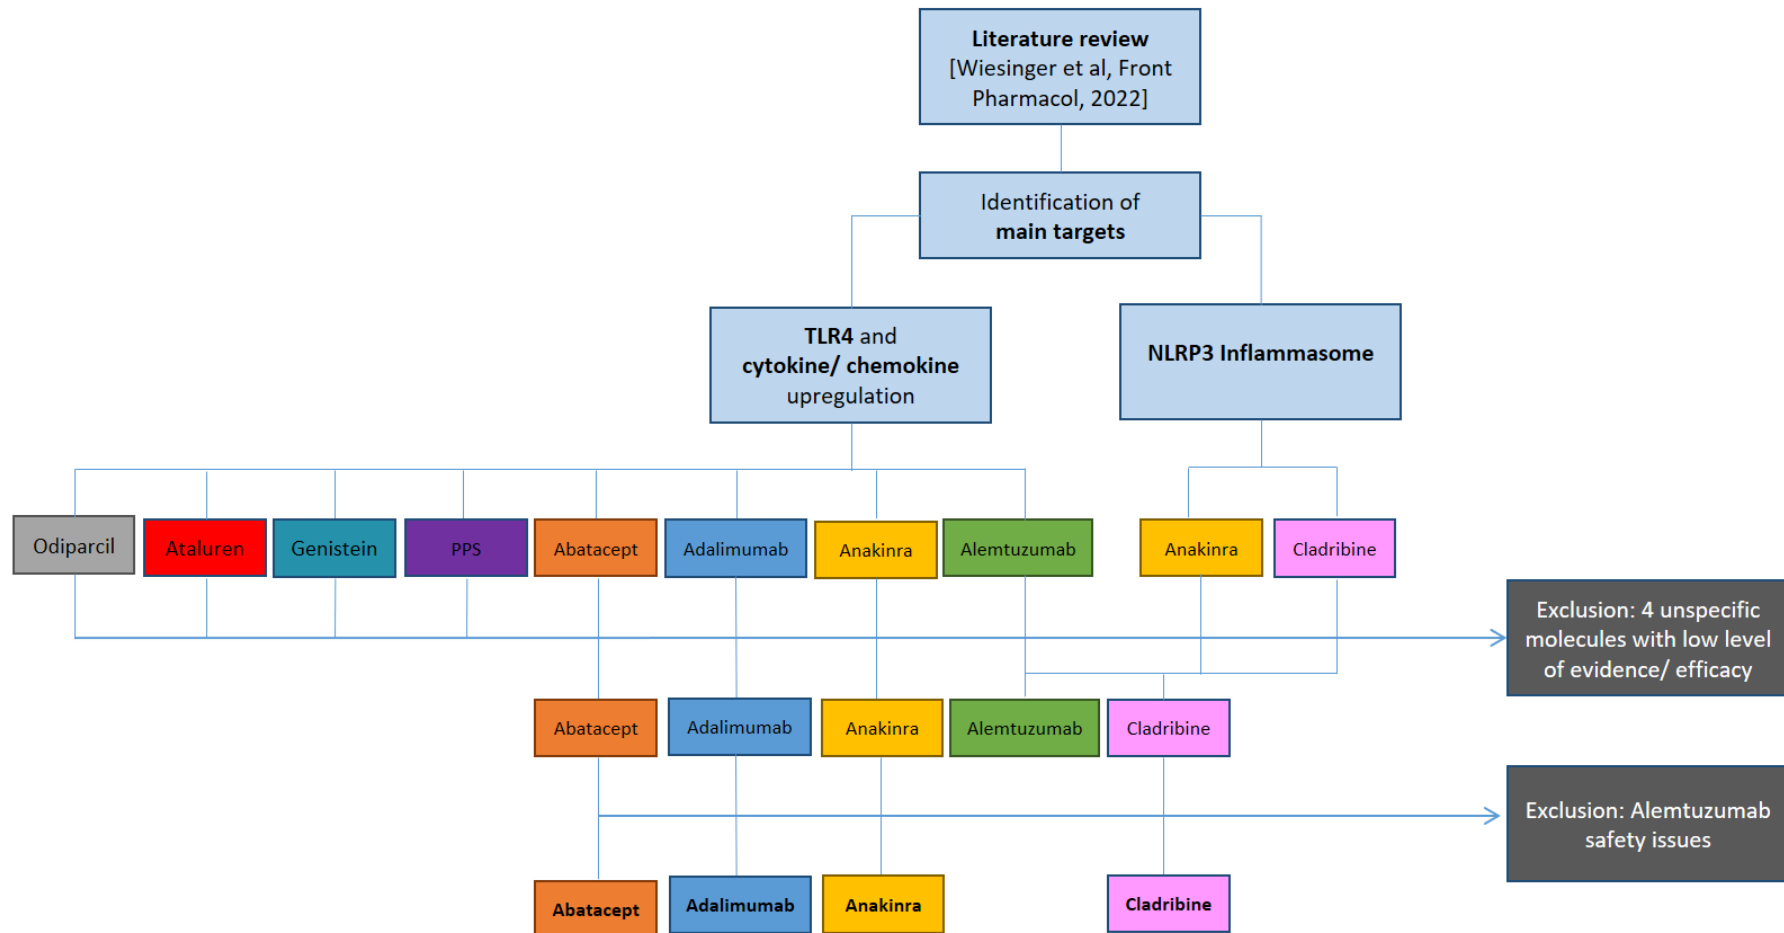

## Data and Drug Selection:

A comprehensive literature review on inflammation driven cell pathology in MPS [1] identified two main targets for intervening in the viscous circle of inflammation in MPS, namely (i) the TLR4 receptor and cytokine/ chemokine upregulation and (ii) the activation of the inflammasome NLRP3. This led us to 9 promising molecules: adalimumab, anakinra, alemtuzumab, pentosan polysulfate (PPS), ataluren, genistein, cladribine and odiparil.

Afterwards, database searching via **Medline** and others (ClinicalTrials, Clarivate, SpringerLink) was performed for each drug using the same search strategy with a defined strict procedure. We searched for English-language reports of **i.) studies in MPS** (regardless of study type and design), **ii.) MPS case reports** and **iii.) phase III or IV randomized placebo-controlled pediatric clinical trials** with at least 12 weeks of treatment duration. This led us to an exclusion of 4 drugs (ataluren, genistein, odiparil, PPS) due to (i) an unexplained mechanism of action and (ii) a low level of evidence compared to the other molecules. Genistein was excluded despite a relatively high number of published studies (324 reports), due to the repeatedly reported low efficacy even in higher doses [2, 3].

Consequently, the remaining five molecules (alemtuzumab, anakinra, adalimumab, abatacept, cladribine) have been further assessed, using the structured, quantitative RBA also used by regulatory authorities [4]. The results of this assessment led the expert board to an exclusion of alemtuzumab due to safety issues [5-24].

By this, we selected the following candidates for integration into our model: anakinra, adalimumab, abatacept and cladribine.

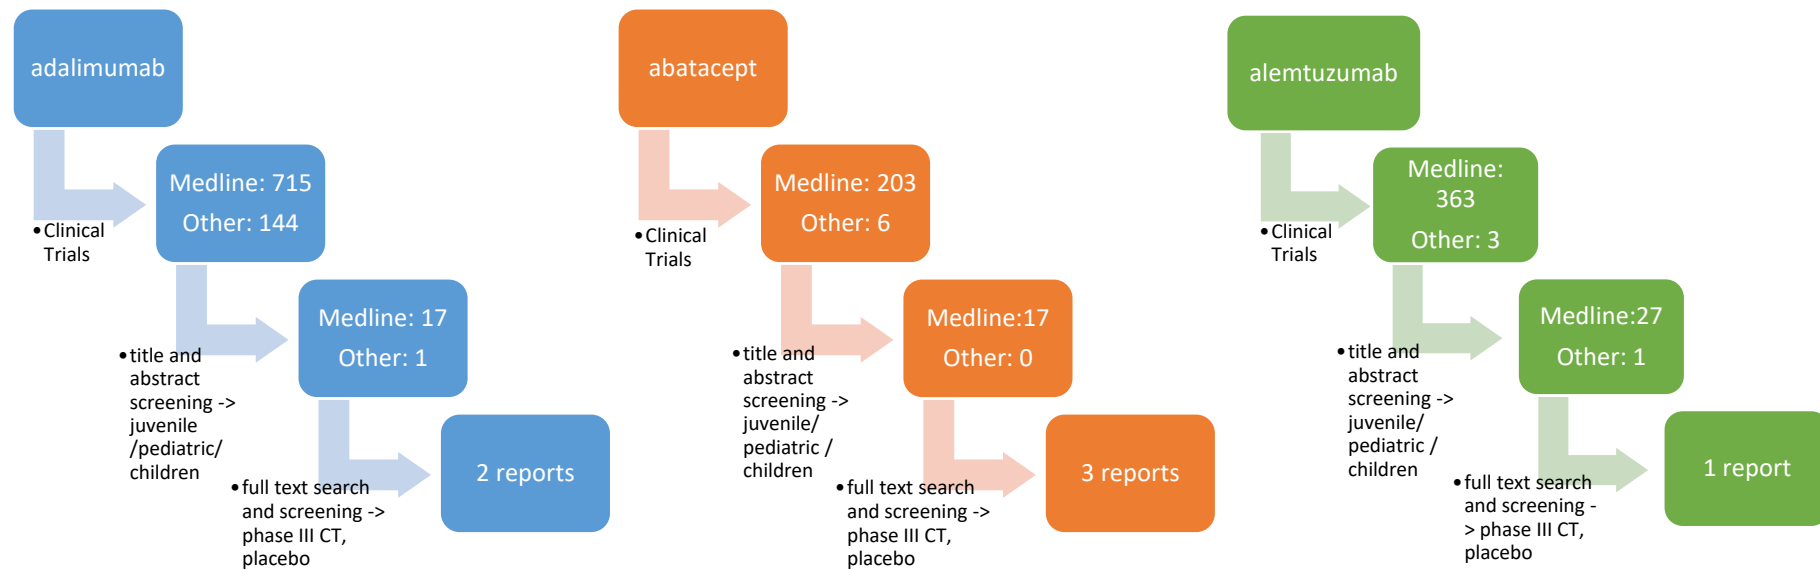

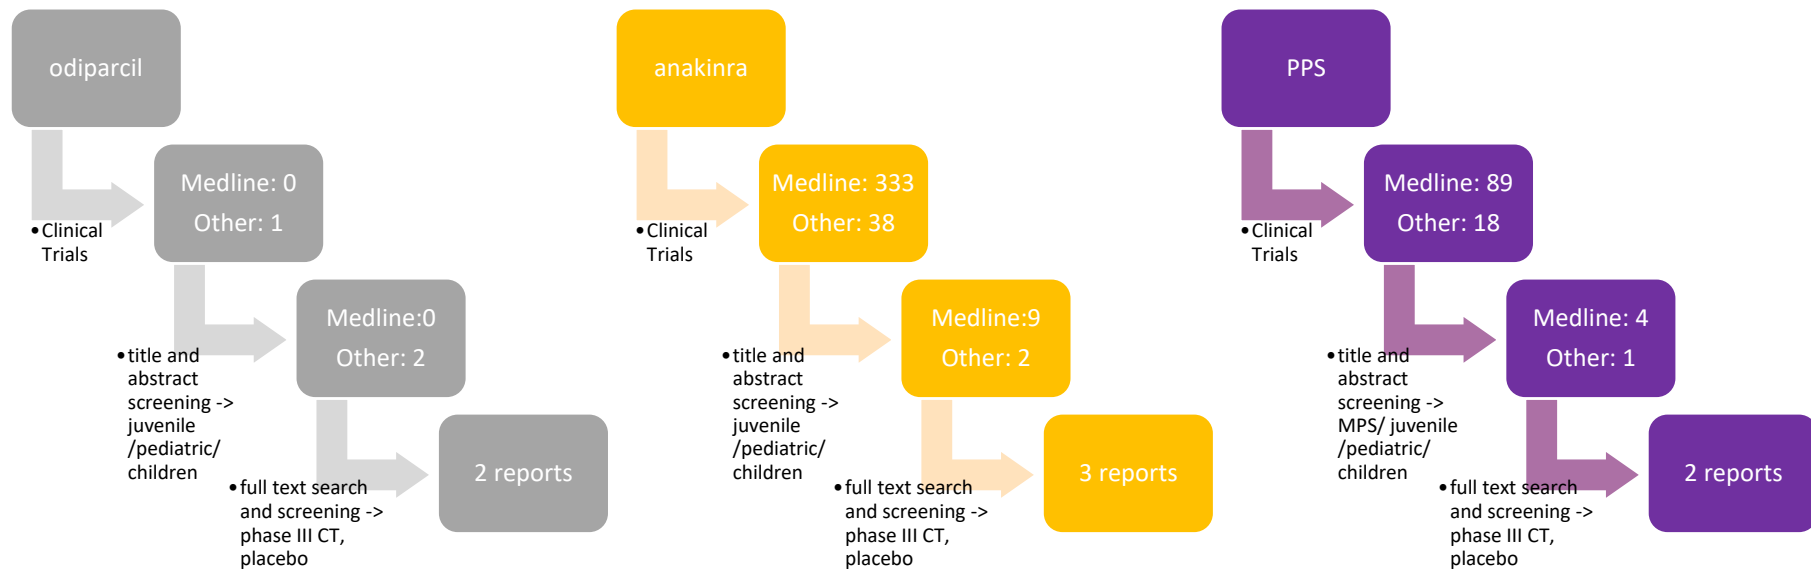

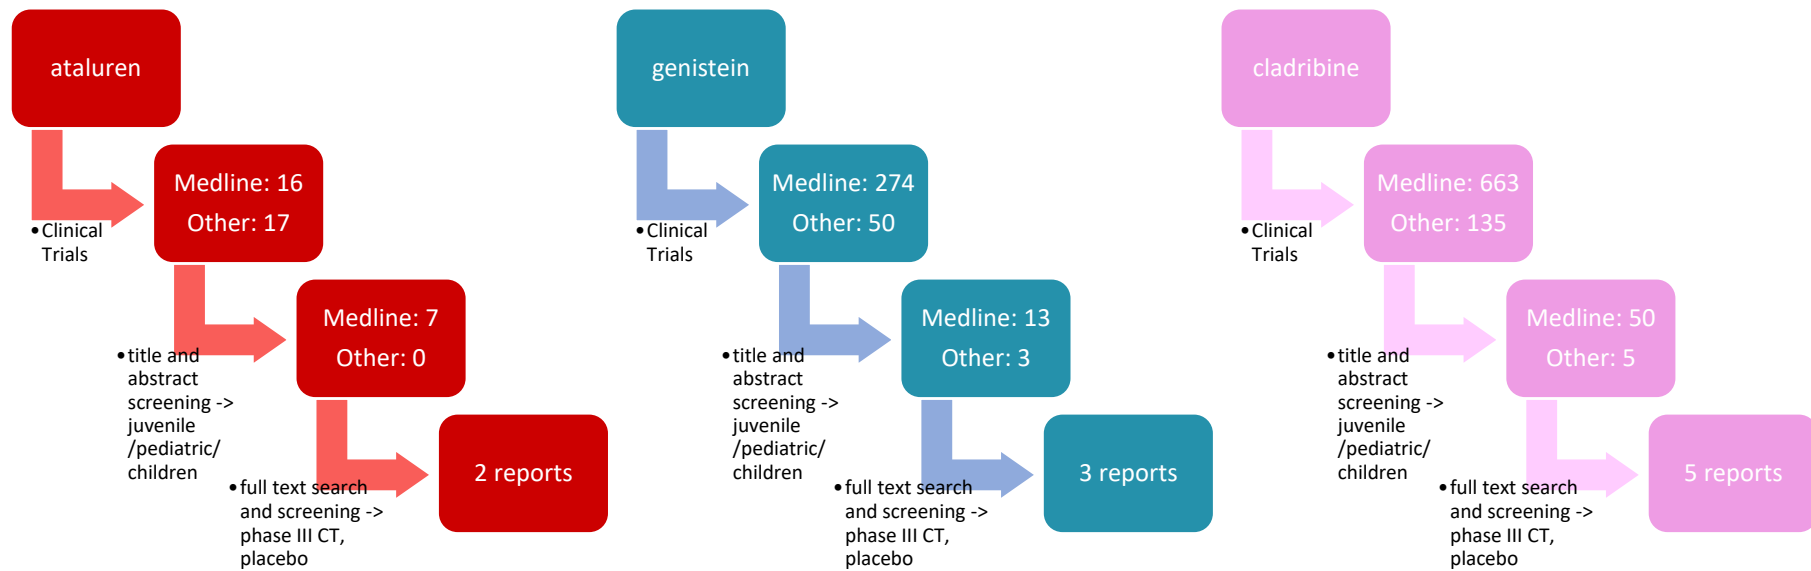

## References:

- [1] A.-M. Wiesinger, B. Bigger, R. Giugliani, M. Scarpa, T. Moser, C. Lampe, C. Kampmann, F.B. Lagler, The Inflammation in the Cytopathology of Patients With Mucopolysaccharidoses-Immunomodulatory Drugs as an Approach to Therapy, *Front. Pharmacol.*, 2022.
- [2] J. de Ruijter, M.J. Valstar, M. Narajczyk, G. Wegrzyn, W. Kulik, L. Ijlst, T. Wagemans, W.M. van der Wal, F.A. Wijburg, Genistein in Sanfilippo disease: a randomized controlled crossover trial, *Ann Neurol* 71(1) (2012) 110-20.
- [3] A. Ghosh, S. Rust, K. Langford-Smith, D. Weisberg, M. Canal, C. Breen, M. Hepburn, K. Tylee, F.M. Vaz, A. Vail, F. Wijburg, C. O'Leary, H. Parker, J.E. Wraith, B.W. Bigger, S.A. Jones, High dose genistein in Sanfilippo syndrome: A randomised controlled trial, *J Inherit Metab Dis* 44(5) (2021) 1248-1262.
- [4] EMA, Proposal for a framework to support not-for-profit organisations and academia (institutions and individuals) in drug repurposing, European Medicines Agency - EMA, 2019, p. 12.
- [5] B. Meunier, A. Rico, J. Segulier, C. Boutiere, M. Ebbo, J.R. Harle, N. Schleinitz, J. Pelletier, Life-threatening autoimmune warm hemolytic anemia following treatment for multiple sclerosis with alemtuzumab, *Mult Scler* 24(6) (2018) 811-813.
- [6] M. di Ioia, D. Farina, V. di Tommaso, D. Travaglini, E. Pietrolongo, M. Onofri, G. de Luca, Simultaneous early-onset severe autoimmune hemolytic anemia and albuminuria during alemtuzumab treatment for multiple sclerosis, *Mult Scler* 24(6) (2018) 813-815.
- [7] D. Ferraro, V. Camera, F. Vitetta, M. Zennaro, L. Ciolli, P.F. Nichelli, P. Sola, Acute coronary syndrome associated with alemtuzumab infusion in multiple sclerosis, *Neurology* 90(18) (2018) 852-854.
- [8] A.A. Liou, B.M. Skiver, E. Yates, P. Persad, D. Meyer, A.M. Farland, M.V. Rocco, Acute Thrombotic Microangiopathy and Cortical Necrosis Following Administration of Alemtuzumab: A Case Report, *Am J Kidney Dis* 73(5) (2019) 615-619.
- [9] D. Whiteside, S. Barth, A. Datta, S.A. Trip, Pneumonitis secondary to alemtuzumab in a patient with multiple sclerosis - A non-infectious cause of breathlessness, *Mult Scler Relat Disord* 22 (2018) 139-140.
- [10] S. El Sankari, G. Dahlqvist, L. Monino, V. van Pesch, Auto-immune hepatitis in a patient with multiple sclerosis treated with alemtuzumab, *Acta Neurol Belg*, Italy, 2018, pp. 331-333.
- [11] B. Giarola, J. Massey, Y. Barnett, M. Rodrigues, I. Sutton, Autoimmune encephalitis following alemtuzumab treatment of multiple sclerosis, *Mult Scler Relat Disord* 28 (2019) 31-33.
- [12] L. Midaglia, M. Gratacòs, E. Caronna, N. Raguer, J. Sastre-Garriga, X. Montalban, M. Tintoré, Myasthenia gravis following alemtuzumab therapy for multiple sclerosis, *Neurology* 91(13) (2018) 622-624.
- [13] K.G. Yiannopoulou, D. Papadimitriou, A.I. Anastasiou, M. Siakantaris, Neutropenia with fatal outcome in a multiple sclerosis patient 23 days after alemtuzumab infusion, *Mult Scler Relat Disord* 23 (2018) 15-16.
- [14] B.M. Hoffman, N.A. Zeid, U. Alam, J.B. Caress, Lambert-Eaton myasthenic syndrome associated with alemtuzumab administration, *Mult Scler Relat Disord* 27 (2019) 131-132.
- [15] C. Lapucci, F. Gualandi, M. Mikulska, S. Palmeri, G. Mancardi, A. Uccelli, A. Laroni, Serum sickness (Like Reaction) in a patient treated with alemtuzumab for multiple sclerosis: A case report, *Mult Scler Relat Disord* 26 (2018) 52-54.
- [16] J. Graf, M. Ringelstein, K. Lepka, J. Schaller, H. Quack, H.P. Hartung, O. Aktas, P. Albrecht, Acute sarcoidosis in a multiple sclerosis patient after alemtuzumab treatment, *Mult Scler* 24(13) (2018) 1776-1778.

- [17] M.D. Willis, B. Hope-Gill, P. Flood-Page, F. Joseph, E. Needham, J. Jones, A. Coles, N.P. Robertson, Sarcoidosis following alemtuzumab treatment for multiple sclerosis, *Mult Scler* 24(13) (2018) 1779-1782.
- [18] T. Ruck, S. Pfeuffer, A. Schulte-Mecklenbeck, C.C. Gross, M. Lindner, D. Metze, J. Ehrchen, W. Sondermann, R. Pul, C. Kleinschnitz, H. Wiendl, S.G. Meuth, L. Klotz, Vitiligo after alemtuzumab treatment: Secondary autoimmunity is not all about B cells, *Neurology* 91(24) (2018) e2233-e2237.
- [19] C. Alcalá, F. Pzére-Miralles, F. Gascón, M. Evole, M. Estutia, S. Gil-Perotín, B. Casanova, Recurrent and universal alopecia areata following alemtuzumab treatment in multiple sclerosis: A secondary autoimmune disease, *Mult Scler Relat Disord* 27 (2019) 406-408.
- [20] A.Z. Myro, G. Bjerke, S. Zarnovicky, T. Holmøy, Diffuse alveolar hemorrhage during alemtuzumab infusion in a patient with multiple sclerosis: a case report, *BMC Pharmacol Toxicol* 19(1) (2018) 75.
- [21] M. Pisa, P. Della Valle, A. Coluccia, V. Martinelli, G. Comi, A. D'Angelo, L. Moiola, Acquired haemophilia A as a secondary autoimmune disease after alemtuzumab treatment in multiple sclerosis: A case report, *Mult Scler Relat Disord* 27 (2019) 403-405.
- [22] P. Aouad, C. Yiannikas, S.L. Fernando, J. Parratt, A case of autoimmune myositis after treatment with alemtuzumab for multiple sclerosis, *Mult Scler J Exp Transl Clin*, United States, 2018, p. 2055217318819012.
- [23] S. Richter, B. Wagner, E.G. Celius, Two cases of diabetes mellitus type 1 after alemtuzumab treatment for multiple sclerosis: another probable secondary autoimmune disease, *J Neurol*, Germany, 2019, pp. 1270-1271.
- [24] S. Gerevini, R. Capra, D. Bertoli, A. Sottini, L. Imberti, Immune profiling of a patient with alemtuzumab-associated progressive multifocal leukoencephalopathy, *Mult Scler* 25(8) (2019) 1196-1201.
